# Supplementary material for: Supertetrahedral polyanionic network in the first lithium phosphidoindate Li3InP2 – structural similarity to Li2SiP2 and Li2GeP2 and dissimilarity to Li3AlP2 and Li3GaP2
Source: Chem Sci. 2020 Nov 27;12(4):1278–85. doi: 10.1039/d0sc05851c (PMC8179136; doi:10.1039/d0sc05851c)
Supplement: SC-012-D0SC05851C-s001 [file SC-012-D0SC05851C-s001.pdf]

## ELECTRONIC SUPPLEMENTARY INFORMATION (ESI)

### **Supertetrahedral Polyanionic Network in the First Lithium Phosphidoindate $\text{Li}_3\text{InP}_2$ - Structural Similarity to $\text{Li}_2\text{SiP}_2$ and $\text{Li}_2\text{GeP}_2$ and Dissimilarity to $\text{Li}_3\text{AlP}_2$ and $\text{Li}_3\text{GaP}_2$**

Tassilo M. F. Restle, Volker L. Deringer, Jan Meyer, Gabriele Raudaschl-Sieber, Thomas F. Fässler

---

| <u>Content:</u>                                                                                                        | <u>page</u> |
|------------------------------------------------------------------------------------------------------------------------|-------------|
| Experimental Section                                                                                                   | 1           |
| Crystallographic Data                                                                                                  | 4           |
| Results of the Rietveld Analysis                                                                                       | 8           |
| PXRD Measurements                                                                                                      | 10          |
| DSC Measurement                                                                                                        | 11          |
| DFT-optimized Lattice Parameters for $\text{Li}_3\text{AlP}_2$ , $\text{Li}_3\text{GaP}_2$ , $\text{Li}_3\text{InP}_2$ | 12          |
| Structural Comparison to $\text{Li}_2\text{SiP}_2$                                                                     | 12          |
| Impedance Spectroscopy                                                                                                 | 13          |
| References                                                                                                             | 13          |

---

#### Experimental Section

All steps of synthesis and sample preparation were carried out inside an argon-filled glove box (MBraun,  $p(\text{H}_2\text{O})$ ,  $p(\text{O}_2) < 0.1$  ppm). Prior to use, lithium (Li, rods, Rockwood Lithium, > 99 %) was cleaned from oxide layers. Indium (In, drops, Sigma-Aldrich, 99.9 %), and phosphorus (P, powder, Sigma-Aldrich, 97 %) were used without any further purification.

**Synthesis of  $\text{Li}_3\text{InP}_2$ .**  $\text{Li}_3\text{InP}_2$  was synthesized from the elements via ball milling and subsequent annealing, followed by rapid quenching. Lithium (318.6 mg, 45.4 mmol, 3.0 equiv.), indium (1741.0 mg, 15.2 mmol, 1.0 equiv.) and phosphorus (967.4 mg, 30.3 mmol, 2.0 equiv.) were ball milled (Fritsch Pulverisette 6) 72 times at 500 rpm with rest periods (every 10 min for 5 min) using a  $\text{ZrO}_2$  milling set (45 mL jar and with 25 balls with a diameter of 1 cm). The obtained black-brown mixture was pressed into pellets with a diameter of 13 mm for 30 sec. at 5 t using a hydraulic press (Specac Atlas 15T). The fragmented pellets were filled into a niobium ampoule (8 mm diameter). The ampoule was sealed in an electric arc furnace (Edmund Bühler MAM1), enclosed in a quartz reaction container under vacuum and subsequently heated with  $5 \text{ K} \cdot \text{min}^{-1}$  to 1023 K, and dwelled for 22 h in a tube furnace (HTM Reetz

Loba 1200-42-600-1-OW with a EURO THERM S 14083 temperature controller). Afterwards, the ampoule was rapidly cooled by quenching in a water-ice mixture. After grinding the pellets, a brick-red powder was obtained.  $\text{Li}_3\text{InP}_2$  is sensitive against moisture and air.

Red single crystals were obtained by the reaction of lithium, indium and phosphorus with the formal stoichiometry " $\text{Li}_3\text{In}_2\text{P}_3$ " in a tantalum ampoule. Lithium (19.4 mg, 2.77 mmol, 3.0 equiv.), indium (211.5 mg, 1.84 mmol, 2.0 equiv.) and phosphorus (88.1 mg, 2.76 mmol, 3.0 equiv.) were filled into a tantalum ampoule. The ampoule was sealed in an electric arc furnace (Edmund Bühler MAM1), enclosed in a quartz reaction container under vacuum and subsequently heated with  $5\text{ K}\cdot\text{min}^{-1}$  to 1073 K, dwelled for 24 h and cooled with  $0.5\text{ K}\cdot\text{min}^{-1}$  to room temperature in a tube furnace (HTM Reetz Loba 1200-42-600-1-OW with a EURO THERM S 14083 temperature controller), yielding a violet product with metallic lustre.

**Powder X-ray diffraction.** For powder X-ray diffraction (PXRD) measurements, the samples were ground in an agate mortar and sealed inside 0.3 mm glass capillaries. PXRD measurements were performed at room temperature on a STOE Stadi P diffractometer equipped with a Ge(111) monochromator for Mo  $K_{\alpha 1}$  radiation ( $\lambda = 0.7093\text{ \AA}$ ) and a Dectris MYTHEN DCS 1K solid-state detector. The raw powder data were processed with the software package WinXPOW.<sup>[1]</sup>

**Rietveld refinement.** Rietveld refinements were performed with TOPAS V6.<sup>[2]</sup> The parameters of the single crystal structure determination were used as the structural model. All cell parameters and the atom positions were refined freely. Isotropic displacement parameters were refined independently for In, and for P and Li a joint displacement parameter was assigned.

**Single crystal structure determination.** A single crystal of  $\text{Li}_3\text{InP}_2$  was sealed in a 0.3 mm glass capillary. The single crystal X-ray diffraction (SCXRD) measurement was performed on a STOE Stadivari diffractometer equipped with a Ge(111) monochromator, an Mo  $K_{\alpha 1}$  radiation ( $\lambda = 0.71073\text{ \AA}$ ) source and a DECTRIS PILATUS3R 300 K detector. The structure was solved by Direct Methods (SHELXS) and refined by full-matrix least-squares calculations against  $F^2$  (SHELXL).<sup>[3]</sup>

**Differential scanning calorimetry (DSC).** For thermal analysis,  $\text{Li}_3\text{InP}_2$  was sealed in a niobium ampoule, and measured on a DSC machine (Netzsch, DSC 404 Pegasus) under a constant gas flow of  $75\text{ mL}\cdot\text{min}^{-1}$ . The samples were heated to 1023 K and then cooled to 423 K twice at a rate of  $5\text{ K}\cdot\text{min}^{-1}$ . To determine the onset temperatures of the DSC signals, the PROTEUS Thermal Analysis software was used.<sup>[4]</sup>

**NMR spectroscopy.** Magic angle spinning (MAS) NMR spectroscopy was carried out on a Bruker Avance 300 NMR device operating at 7.04 T by the use of a 4 mm  $\text{ZrO}_2$  rotor. The resonance frequencies of the measured nuclei are 44.17 MHz and 121.46 MHz for  $^6\text{Li}$  and  $^{31}\text{P}$ , respectively. The rotational frequency was 15 kHz. The MAS spectra have been obtained at room temperature with relaxation delays of 10 s

( $^6\text{Li}$ ) and 30 s ( $^{31}\text{P}$ ), and 880 scans ( $^6\text{Li}$ ) and 360 scans ( $^{31}\text{P}$ ). The spectra are referenced to LiCl (1 M, aq) and LiCl (s) offering chemical shifts of 0.0 ppm and -1.15 ppm, respectively. The  $^{31}\text{P}$  spectrum is referred to ammonium dihydrogen phosphate (s) with a chemical shift of 1.11 ppm with reference to concentrated  $\text{H}_3\text{PO}_4$ . All spectra were recorded using single-pulse excitation.

**Impedance spectroscopy.** The electrochemical impedance spectroscopy for  $\text{Li}_3\text{InP}_2$  was performed in an in-house designed cell. The detailed setup and procedure are described in Restle *et al.*<sup>[5]</sup> Powdered samples of  $\text{Li}_3\text{InP}_2$  (300 mg) were placed between two 8 mm dies, and the screws were fastened with a torque of 30 Nm, compressing the samples to 89 % of the theoretical density. Impedance spectra were recorded on a Bio-Logic potentiostat (SP-300) in a frequency range from 7 MHz to 50 mHz at a potentiostatic excitation of  $\pm 10$  mV. Data were treated using the software EC-Lab (V 11.27). The measurements were performed in an Ar-filled glove box between 299 K. The electronic conductivity was determined with the same setup using a potentiostatic polarization procedure, applying voltages of 50, 100 and 150 mV for 7 h each.

**Density-functional theory (DFT) computations.** First-principles computations in the framework of DFT were carried out based on the experimentally obtained structural data and subsequent geometry optimization. The PBEsol functional<sup>[6]</sup> and on-the-fly ultrasoft pseudopotentials were employed as implemented in CASTEP.<sup>[7]</sup> Reciprocal space was sampled at the  $\Gamma$  point for structural relaxation of the title compound, on a  $3\times 3\times 2$  grid of points for a subsequent single-point energy evaluation, and on appropriately adjusted grids for all other compounds considered. The electronic cut-off energy for plane-wave expansions was 1000 eV, and all reported single-point energies are corrected for finite-basis-set effects.<sup>[8]</sup> Energies of formation were obtained relative to the elements (their modifications taken to be *bcc* Li, *fcc* Al,  $\alpha$ -Ga, body-centered tetragonal In, and orthorhombic black P), and relative to the binary compounds (hexagonal  $\text{Li}_3\text{P}$ ,<sup>[9]</sup> and zinc blende-type AlP, GaP, and InP). Mulliken charges on atoms were obtained as implemented in CASTEP.<sup>[10]</sup>

## Crystallographic Data

**Table S 1.** Crystallographic data and refinement parameters of the SC-XRD analysis of  $\text{Li}_3\text{InP}_2$ .

|                                                                                                                |                                                    |
|----------------------------------------------------------------------------------------------------------------|----------------------------------------------------|
| Empirical formula                                                                                              | $\text{Li}_3\text{InP}_2$                          |
| Formula weight / $\text{g}\cdot\text{mol}^{-1}$                                                                | 197.58                                             |
| Crystal size / $\text{mm}^3$                                                                                   | 0.1 x 0.1 x 0.05                                   |
| Crystal color                                                                                                  | red                                                |
| Crystal shape                                                                                                  | block                                              |
| $T$ / K                                                                                                        | 150                                                |
| Space group                                                                                                    | $I4_1/acd$ (no. 142)                               |
| Unit cell dimension / Å                                                                                        | $a = 12.0065(3)$<br>$c = 23.9165(7)$               |
| $V$ / Å <sup>3</sup>                                                                                           | 3447.7(2)                                          |
| $Z$                                                                                                            | 32                                                 |
| $\rho$ (calc.) / $\text{g}\cdot\text{cm}^{-3}$                                                                 | 3.045                                              |
| $\mu$ / $\text{mm}^{-1}$                                                                                       | 5.993                                              |
| $\theta$ Range / deg                                                                                           | 5.886 - 85.77                                      |
| Index range $hkl$                                                                                              | $-16 < h < 19$<br>$-19 < k < 19$<br>$-38 < l < 36$ |
| Reflections collected                                                                                          | 67179                                              |
| Independent reflections                                                                                        | 39481                                              |
| $R_{\text{int}}$                                                                                               | 0.0331                                             |
| Reflections with $I > 2 \sigma(I)$                                                                             | 1577                                               |
| Data/restraints/parameter                                                                                      | 1905/0/56                                          |
| Absorption correction                                                                                          | Empirical                                          |
| Goodness-of-fit on $F^2$                                                                                       | 1.023                                              |
| Final $R$ indices $[I > 2 \sigma(I)]^{a,b}$                                                                    | $R_1 = 0.014$<br>$wR_2 = 0.030$                    |
| $R$ indices (all data) $^{a,b}$                                                                                | $R_1 = 0.021$<br>$wR_2 = 0.032$                    |
| Largest diff. peak and hole/ $\text{e}\cdot\text{Å}^{-3}$                                                      | 0.427/-0.818                                       |
| Depository no.                                                                                                 | CSD-2026514                                        |
| $^a R_1 = \sum   F_o  -  F_c   / \sum  F_o $ . $^b wR_2 = [\sum w(F_o^2 - F_c^2)^2 / \sum w(F_o^2)^2]^{1/2}$ . |                                                    |

**Table S 2.** Atomic coordinates and isotropic displacement parameters for  $\text{Li}_3\text{InP}_2$  from a single crystal structure determination at 150 K.

| Atom | Wyckoff position | $x$        | $y$           | $z$           | $U_{\text{iso}}$ |
|------|------------------|------------|---------------|---------------|------------------|
| In1  | 32g              | 0.11730(2) | 0.12523(2)    | 0.31365(2)    | 0.00578(3)       |
| P1   | 16d              | 0          | $\frac{1}{4}$ | 0.00065(2)    | 0.00610(8)       |
| P2   | 16e              | 0.23884(3) | 0             | $\frac{1}{4}$ | 0.00597(8)       |
| P3   | 32g              | 0.25031(2) | 0.25604(2)    | 0.12516(2)    | 0.00613(6)       |
| Li1  | 32g              | 0.1279(2)  | 0.3720(2)     | 0.0615(1)     | 0.0143(5)        |
| Li2  | 32g              | 0.1179(2)  | 0.1250(2)     | 0.0651(1)     | 0.0118(5)        |
| Li3  | 32g              | 0.3635(2)  | 0.1212(2)     | 0.19053(9)    | 0.0111(4)        |

**Table S 3.** Anisotropic displacement parameters ( $\text{\AA}^2$ ) for  $\text{Li}_3\text{InP}_2$  from a single crystal structure determination at 150 K.

| Atom | $U_{11}$   | $U_{22}$   | $U_{33}$   | $U_{12}$    | $U_{13}$   | $U_{23}$    |
|------|------------|------------|------------|-------------|------------|-------------|
| In1  | 0.00608(4) | 0.00592(4) | 0.00532(4) | 0.00011(4)  | 0.00006(3) | -0.00009(3) |
| P1   | 0.0066(2)  | 0.0062(2)  | 0.0054(2)  | 0.0008(1)   | 0.00000    | 0.00000     |
| P2   | 0.0059(2)  | 0.00645(2) | 0.0056(2)  | 0.00000     | 0.00000    | -0.0007(1)  |
| P3   | 0.0061(1)  | 0.0065(1)  | 0.0058(1)  | -0.00002(9) | 0.00000(9) | -0.00063(9) |
| Li1  | 0.013(1)   | 0.016(1)   | 0.014(1)   | -0.001(1)   | -0.004(1)  | 0.001(1)    |
| Li2  | 0.009(1)   | 0.014(1)   | 0.012(1)   | 0.002(1)    | -0.0003(8) | 0.0000(9)   |
| Li3  | 0.0127(9)  | 0.0093(9)  | 0.011(1)   | -0.002(1)   | -0.0014(8) | 0.0019(9)   |

**Table S 4.** Selected interatomic distances up to 3 Å in Li<sub>3</sub>InP<sub>2</sub> from a single crystal structure determination at 150 K.

| atom pair    |     |    |           | atom pair    |     |    |          |
|--------------|-----|----|-----------|--------------|-----|----|----------|
| <i>d</i> / Å |     |    |           | <i>d</i> / Å |     |    |          |
| In1          | P1  | 1x | 2.5676(3) | Li2          | P3  | 1x | 2.553(2) |
|              | P3  | 1x | 2.5704(3) |              | P1  | 1x | 2.575(2) |
|              | P3  | 1x | 2.5885(3) |              | P2  | 1x | 2.609(2) |
|              | P2  | 1x | 2.5898(2) |              | P3  | 1x | 2.659(2) |
|              | Li3 | 1x | 3.041(2)  |              | Li2 | 1x | 2.868(6) |
|              | Li3 | 1x | 3.050(3)  |              | Li3 | 1x | 2.869(4) |
|              | Li3 | 1x | 3.055(2)  |              | Li1 | 1x | 2.953(3) |
|              | Li2 | 1x | 3.082(3)  |              | Li1 | 1x | 2.969(3) |
|              | Li2 | 1x | 3.092(2)  |              | In1 | 1x | 3.082(3) |
|              | Li1 | 1x | 3.131(2)  |              | In1 | 1x | 3.091(2) |
| P1           | In1 | 2x | 2.5676(3) | Li3          | P2  | 1x | 2.525(3) |
|              | Li1 | 2x | 2.573(2)  |              | P3  | 1x | 2.629(2) |
|              | Li2 | 2x | 2.575(2)  |              | P3  | 1x | 2.651(2) |
| P2           | Li3 | 2x | 2.674(2)  |              | P1  | 1x | 2.674(2) |
|              | Li3 | 2x | 2.525(3)  |              | Li2 | 1x | 2.869(4) |
|              | In1 | 2x | 2.5898(3) |              | Li1 | 1x | 2.898(4) |
| P3           | Li2 | 2x | 2.609(2)  |              | Li1 | 1x | 2.926(3) |
|              | Li1 | 2x | 2.665(2)  |              | In1 | 1x | 3.041(2) |
|              | Li1 | 1x | 2.533(2)  |              | In1 | 1x | 3.050(3) |
| Li1          | Li2 | 1x | 2.553(2)  |              | In1 | 1x | 3.055(2) |
|              | In1 | 1x | 2.5704(3) |              |     |    |          |
|              | In1 | 1x | 2.5885(3) |              |     |    |          |
|              | Li1 | 1x | 2.610(2)  |              |     |    |          |
|              | Li3 | 1x | 2.629(2)  |              |     |    |          |
|              | Li3 | 1x | 2.651(2)  |              |     |    |          |
|              | Li2 | 1x | 2.659(2)  |              |     |    |          |
|              | P3  | 1x | 2.533(2)  |              |     |    |          |
|              | P1  | 1x | 2.573(2)  |              |     |    |          |
|              | P3  | 1x | 2.610(2)  |              |     |    |          |
|              | P2  | 2x | 2.665(2)  |              |     |    |          |
|              | Li3 | 1x | 2.898(4)  |              |     |    |          |
|              | Li3 | 1x | 2.926(3)  |              |     |    |          |
|              | Li2 | 1x | 2.953(3)  |              |     |    |          |
|              | Li2 | 1x | 2.969(3)  |              |     |    |          |
|              | Li1 | 1x | 3.039(4)  |              |     |    |          |
|              | In1 | 1x | 3.131(2)  |              |     |    |          |

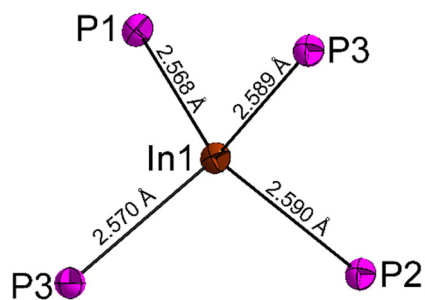

**Figure S 1.** Coordination polyhedron of the In atom by phosphorus in  $\text{Li}_3\text{InP}_2$ . The neighbor's phosphorus atoms form slightly distorted tetrahedra.

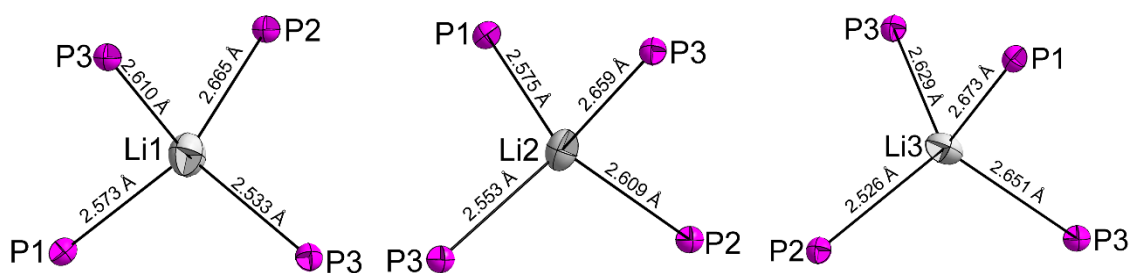

**Figure S 2.** Coordination polyhedra of the Li atoms by phosphorus in  $\text{Li}_3\text{InP}_2$ . The neighbor's phosphorus atoms form slightly distorted tetrahedra.

## Rietveld Analysis

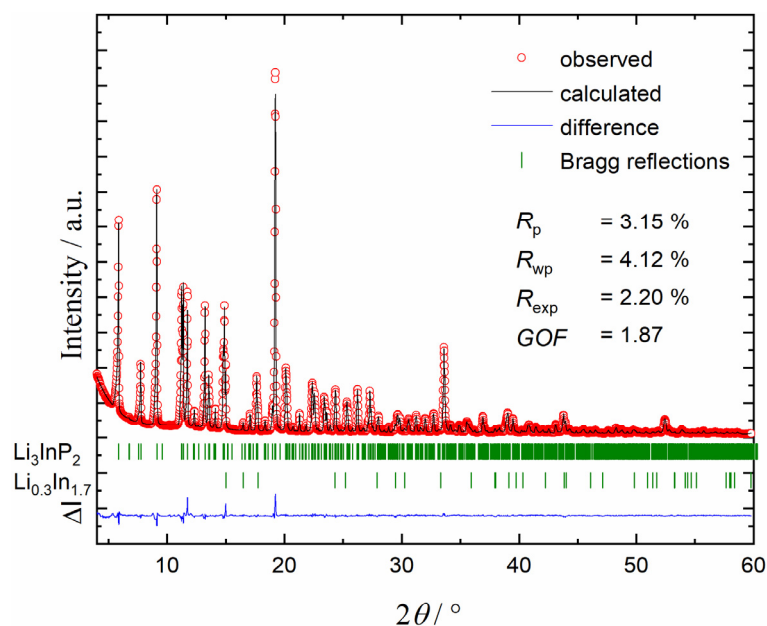

**Figure S 3.** Rietveld analysis of the powder X-ray diffractogram of  $\text{Li}_3\text{InP}_2$ . The red line indicates the observed intensities, the black line the calculated intensities and the blue line the difference between both. Bragg positions are marked by green dashes. The ratio of  $\text{Li}_3\text{InP}_2$  to  $\text{Li}_{0.3}\text{In}_{1.7}$  is 96.7(1) wt.-%: 3.3(1) wt.-%.

**Table S 5.** Crystallographic data of  $\text{Li}_3\text{InP}_2$  obtained from powder XRD by Rietveld refinement.

|                    |                                                               |
|--------------------|---------------------------------------------------------------|
| Empirical formula  | $\text{Li}_3\text{InP}_2$                                     |
| Formula weight     | $197.58 \text{ g}\cdot\text{mol}^{-1}$                        |
| Temperature        | 293 K                                                         |
| Color              | red                                                           |
| Crystal system     | tetragonal                                                    |
| Space group        | $I41/acd$ (no. 142)                                           |
| Lattice parameters | $a = 12.03049(8) \text{ \AA}$<br>$c = 23.9641(3) \text{ \AA}$ |
| $V$                | $3468.39(6) \text{ \AA}^3$                                    |
| $Z$                | 32                                                            |
| $\rho$ (calc.)     | $3.02715(5) \text{ g}\cdot\text{cm}^{-3}$                     |
| Wavelength         | $0.70930 \text{ \AA}$                                         |
| $\Theta$ Range     | $3.997 - 59.812 \text{ deg}$                                  |
| $R_p$              | 0.0315                                                        |
| $R_{wp}$           | 0.0412                                                        |
| $R_{exp}$          | 0.0220                                                        |
| GOF                | 1.871                                                         |

**Table S 6.** Atomic coordinates and isotropic displacement parameters for  $\text{Li}_3\text{InP}_2$  from Rietveld analysis.

| Atom | Wyckoff position | <i>x</i>  | <i>y</i>      | <i>z</i>      | <i>U</i> <sub>iso</sub> |
|------|------------------|-----------|---------------|---------------|-------------------------|
| In1  | 32g              | 0.1171(1) | 0.1253(1)     | 0.31358(7)    | 0.0059(2)               |
| P1   | 16d              | 0         | $\frac{1}{4}$ | 0.0012 (3)    | 0.0053(3)               |
| P2   | 16e              | 0.2395(4) | 0             | $\frac{1}{4}$ | 0.0053(3)               |
| P3   | 32g              | 0.2501(3) | 0.2567(3)     | 0.1249(4)     | 0.0053(3)               |
| Li1  | 32g              | 0.132(2)  | 0.368(2)      | 0.060(2)      | 0.003(2)                |
| Li2  | 32g              | 0.116(3)  | 0.122(2)      | 0.066(1)      | 0.003(2)                |
| Li3  | 32g              | 0.370(2)  | 0.122(3)      | 0.193(1)      | 0.003(2)                |

## PXRD Measurements

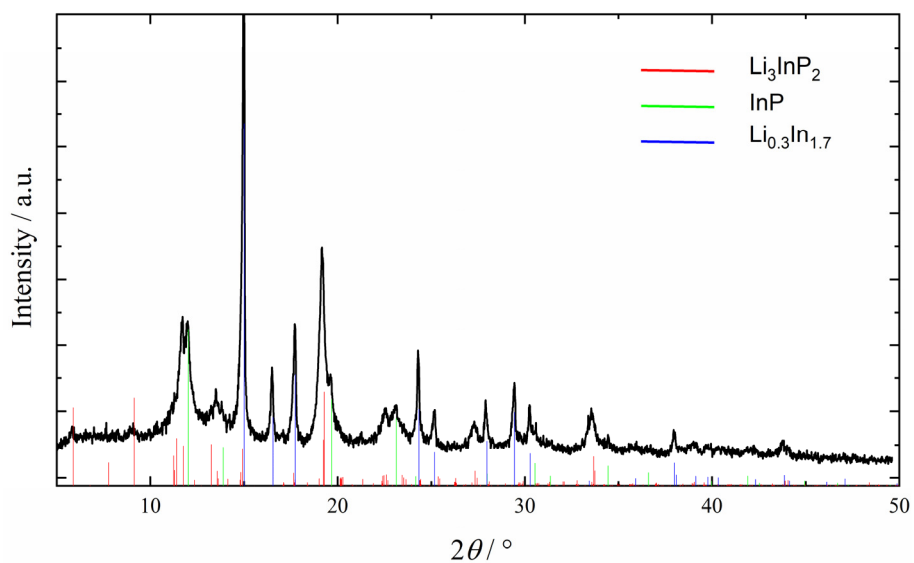

**Figure S 4.** Experimental powder X-ray diffraction pattern of the product of ball milled elements in a stoichiometric ratio of 3 Li + In + 2 P.

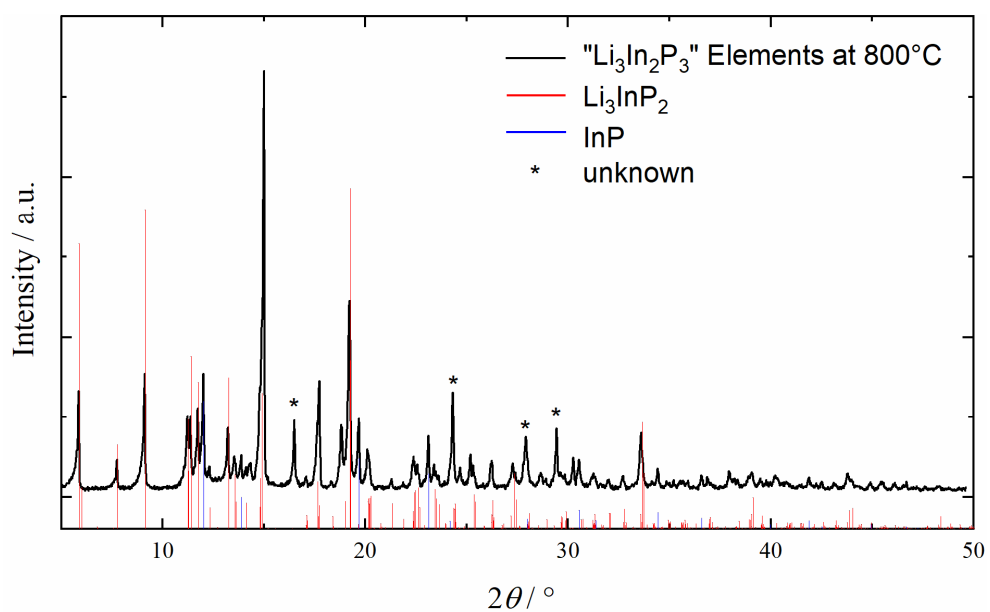

**Figure S 5.** Experimental powder X-ray diffraction pattern of the product of the reaction 3 Li + 2 In + 3 P at 1073 K in a tantalum ampoule.

## DSC Measurement

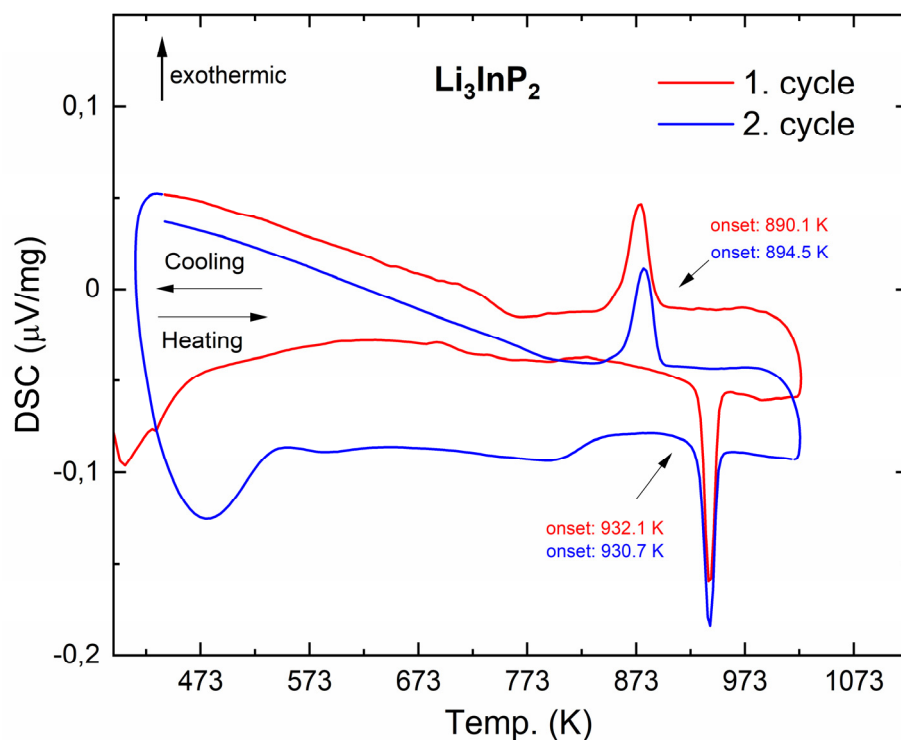

**Figure S 6.** DSC curves of the reactive mixture of  $\text{Li}_3\text{InP}_2$ . Two measurement cycles were performed using heating/cooling rates of  $5 \text{ K} \cdot \text{min}^{-1}$ . The reversible signal at around 930 K might belong to the melting process of  $\text{Li}_3\text{InP}_2$ . The PXRD after the DSC measurement (Figure S7) looks equal to the PXRD before the measurement.

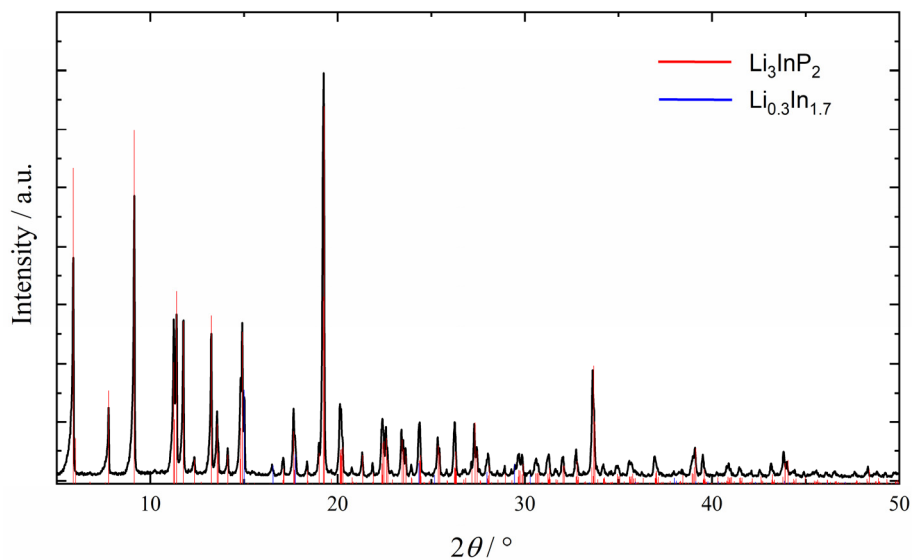

**Figure S 7.** Experimental powder X-ray diffraction pattern of the product of the DSC measurement.

## DFT-optimized lattice parameters for $\text{Li}_3\text{AlP}_2$ , $\text{Li}_3\text{GaP}_2$ and $\text{Li}_3\text{InP}_2$

**Table S 7.** DFT-optimized lattice parameters for  $\text{Li}_3\text{AlP}_2$ ,  $\text{Li}_3\text{GaP}_2$  and  $\text{Li}_3\text{InP}_2$  in the space groups  $Cmce$  and  $I4_1/acd$ , respectively. Boldface entries emphasize the structure types, which were found by experiments. Italic entries emphasize the hypothetical structures obtained by substitution into homologous structures and subsequent relaxation.

|                           | <i>Cmce</i>                          |                                      |                                      | <i>I4<sub>1</sub>/acd</i>            |                                      |                                      |
|---------------------------|--------------------------------------|--------------------------------------|--------------------------------------|--------------------------------------|--------------------------------------|--------------------------------------|
|                           | <i>o</i> - $\text{Li}_3\text{AlP}_2$ | <i>o</i> - $\text{Li}_3\text{GaP}_2$ | <i>o</i> - $\text{Li}_3\text{InP}_2$ | <i>t</i> - $\text{Li}_3\text{AlP}_2$ | <i>t</i> - $\text{Li}_3\text{GaP}_2$ | <i>t</i> - $\text{Li}_3\text{InP}_2$ |
| <i>a</i> / Å              | <b>11.439</b>                        | <b>11.517</b>                        | <i>11.991</i>                        | <i>11.564</i>                        | <i>11.584</i>                        | <b>11.959</b>                        |
| <i>b</i> / Å              | <b>11.660</b>                        | <b>11.656</b>                        | <i>11.953</i>                        | <i>11.564</i>                        | <i>11.584</i>                        | <b>11.959</b>                        |
| <i>c</i> / Å              | <b>5.772</b>                         | <b>5.763</b>                         | <i>5.968</i>                         | <i>22.835</i>                        | <i>22.833</i>                        | <b>23.743</b>                        |
| <i>V</i> / Å <sup>3</sup> | <b>769.86</b>                        | <b>773.64</b>                        | <i>88.38</i>                         | <i>3053.64</i>                       | <i>3063.94</i>                       | <b>3395.67</b>                       |

## Structural Comparison to $\text{Li}_2\text{SiP}_2$

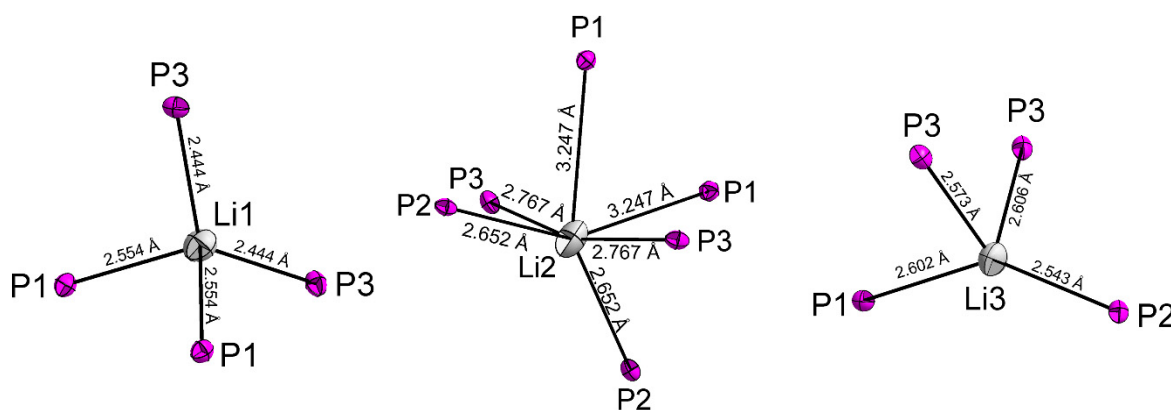

**Figure S 8.** Coordination polyhedra of the Li atoms by phosphorus in  $\text{Li}_2\text{SiP}_2$ . The neighbor's phosphorus atoms form strongly distorted tetrahedra for Li1 and Li2 and strongly distorted octahedra for Li2.

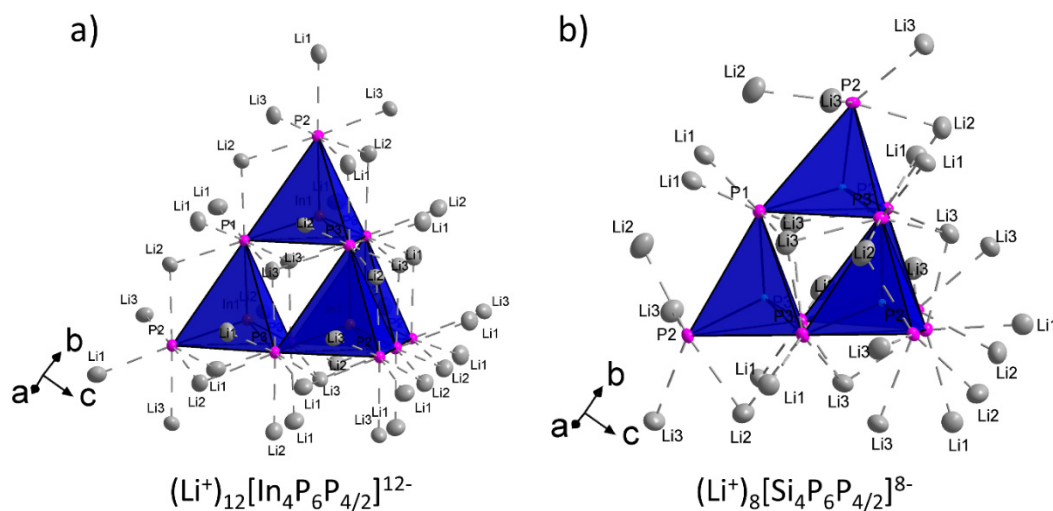

**Figure S 9.** Comparison of the lithium atoms in the first coordination sphere of the supertetrahedra in  $\text{Li}_3\text{InP}_2$  (a) and  $\text{Li}_2\text{SiP}_2$  (b).

## Impedance Spectroscopy

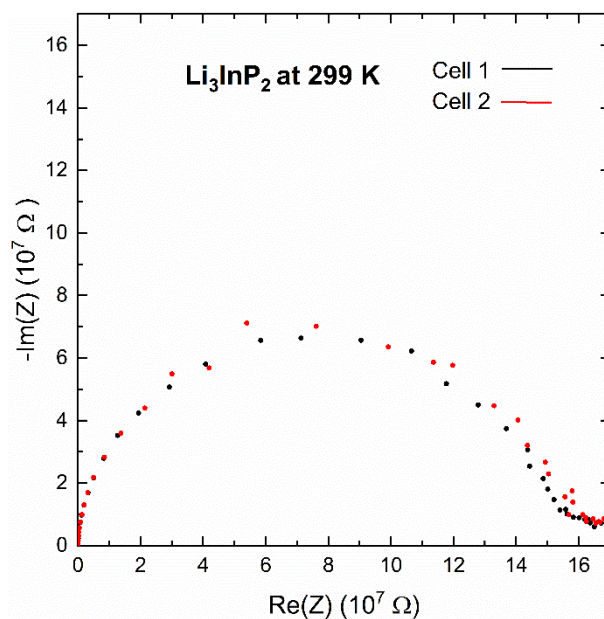

**Figure S 10.** Nyquist plot of  $\text{Li}_3\text{InP}_2$  measured under blocking conditions and recorded at 299 K.

## References

- [1] WinXPOW, 3.0.2.1, STOE & Cie GmbH, Darmstadt, Germany, **2011**.
- [2] TOPAS, 6, Bruker AXS, **2016**.
- [3] G. Sheldrick, *Acta Crystallogr., Sect. C: Struct. Chem.* **2015**, *71*, 3-8.
- [4] PROTEUS Thermal Analysis V4.8.2, Netzsch-Gerätebau GmbH, Selb, **2006**.
- [5] T. M. F. Restle, C. Sedlmeier, H. Kirchhain, W. Klein, G. Raudaschl-Sieber, V. L. Deringer, L. v. Wüllen, H. A. Gasteiger, T. F. Fässler, *Angew. Chem. Int. Ed.* **2020**, *59*, 5665-5674.
- [6] J. P. Perdew, A. Ruzsinszky, G. I. Csonka, O. A. Vydrov, G. E. Scuseria, L. A. Constantin, X. Zhou, K. Burke, *Phys. Rev. Lett.* **2008**, *100*, 136406.
- [7] S. J. Clark, M. D. Segall, C. J. Pickard, P. J. Hasnip, M. J. Probert, K. Refson, M. C. Payne, *Z. Krist.* **2005**, *220*, 567-570.
- [8] G. P. Francis, M. C. Payne, *J. Phys.-Condes. Matter* **1990**, *2*, 4395-4404.
- [9] Y. Dong, F. J. DiSalvo, *Acta Crystallogr., Sect. E* **2007**, *63*, i97--i98.
- [10] M. D. Segall, R. Shah, C. J. Pickard, M. C. Payne, *Phys. Rev. B* **1996**, *54*, 16317-16320.
